# Supplementary material
Source: PubMed Central journal article supplement (PMC3707128)
Supplement: NIHMS236603-supplement-SI.pdf [file NIHMS236603-supplement-SI.pdf]

## **Supplemental Tables and Figures**

The basis for haplotype complexity in VCBP, an immune-type receptor in amphioxus

L. J. Dishaw et al. 2010

**Supplement table 1. Nucleotide substitution patterns among the VCBP2/5 gene loci.**

**Ps**

|               | Within a locus |              |              | Between loci |              |              |
|---------------|----------------|--------------|--------------|--------------|--------------|--------------|
|               | <b>5a</b>      | <b>2b</b>    | <b>5b</b>    | <b>5a-2b</b> | <b>2b-5b</b> | <b>5b-5a</b> |
| Entire region | 0.218(0.019)   | 0.110(0.015) | 0.127(0.017) | 0.454(0.027) | 0.419(0.022) | 0.298(0.022) |
| V1 (420)      | 0.269(0.036)   | 0.111(0.025) | 0.162(0.028) | 0.347(0.041) | 0.209(0.030) | 0.344(0.036) |
| V2 (492)      | 0.186(0.030)   | 0.089(0.023) | 0.119(0.028) | 0.530(0.042) | 0.513(0.044) | 0.285(0.035) |
| Exon1 (58)    | 0.308(0.098)   | 0.206(0.086) | 0.172(0.093) | 0.274(0.071) | 0.738(0.093) | 0.749(0.077) |
| Exon2 (170)   | 0.199(0.047)   | 0.102(0.040) | 0.185(0.047) | 0.217(0.041) | 0.216(0.040) | 0.229(0.047) |
| Exon3 (250)   | 0.322(0.051)   | 0.116(0.034) | 0.146(0.039) | 0.440(0.057) | 0.195(0.042) | 0.440(0.053) |
| Exon4 (171)   | 0.148(0.045)   | 0.142(0.046) | 0.192(0.052) | 0.467(0.072) | 0.459(0.063) | 0.419(0.075) |
| Exon5 (135)   | 0.228(0.065)   | 0.051(0.035) | 0.029(0.029) | 0.662(0.092) | 0.640(0.102) | 0.204(0.065) |
| Exon6 (186)   | 0.202(0.050)   | 0.059(0.031) | 0.098(0.040) | 0.483(0.071) | 0.464(0.084) | 0.200(0.044) |
| Exon7 (182)   | 0.135(0.045)   | 0.134(0.043) | 0.060(0.028) | 0.548(0.071) | 0.565(0.076) | 0.091(0.025) |

**Ds**

|               | Within a locus |              |              | Between loci |              |              |
|---------------|----------------|--------------|--------------|--------------|--------------|--------------|
|               | <b>5a</b>      | <b>2b</b>    | <b>5b</b>    | <b>5a-2b</b> | <b>2b-5b</b> | <b>5b-5a</b> |
| Entire region | 0.260(0.030)   | 0.121(0.019) | 0.139(0.020) | 0.698(0.069) | 0.615(0.065) | 0.380(0.035) |
| V1            | 0.336(0.063)   | 0.122(0.033) | 0.182(0.036) | 0.466(0.078) | 0.245(0.042) | 0.463(0.073) |
| V2            | 0.217(0.041)   | 0.096(0.027) | 0.130(0.031) | 0.926(0.182) | 0.865(0.171) | 0.360(0.065) |
| Exon1         | 0.425(0.237)   | 0.253(0.136) | 0.197(0.131) | 0.360(0.141) | 2.038(0.638) | 1.950(0.499) |
| Exon2         | 0.234(0.067)   | 0.114(0.046) | 0.214(0.065) | 0.258(0.066) | 0.276(0.072) | 0.263(0.064) |
| Exon3         | 0.435(0.100)   | 0.127(0.039) | 0.163(0.046) | 0.671(0.155) | 0.227(0.057) | 0.672(0.147) |
| Exon4         | 0.168(0.060)   | 0.161(0.063) | 0.221(0.073) | 0.733(0.221) | 0.716(0.190) | 0.617(0.179) |
| Exon5         | 0.280(0.109)   | 0.054(0.040) | 0.030(0.031) | 1.693(0.559) | 1.510(0.566) | 0.239(0.100) |
| Exon6         | 0.237(0.078)   | 0.062(0.038) | 0.106(0.051) | 0.780(0.261) | 0.726(0.298) | 0.234(0.062) |
| Exon7         | 0.149(0.055)   | 0.149(0.057) | 0.064(0.032) | 0.991(0.316) | 1.062(0.366) | 0.098(0.031) |

**Pn**

|               | Within a locus |              |              | Between loci |              |              |
|---------------|----------------|--------------|--------------|--------------|--------------|--------------|
|               | <b>5a</b>      | <b>2b</b>    | <b>5b</b>    | <b>5a-2b</b> | <b>2b-5b</b> | <b>5b-5a</b> |
| Entire region | 0.114(0.011)   | 0.032(0.005) | 0.026(0.005) | 0.227(0.015) | 0.211(0.017) | 0.141(0.013) |
| V1            | 0.132(0.020)   | 0.031(0.009) | 0.022(0.009) | 0.160(0.020) | 0.085(0.018) | 0.149(0.021) |
| V2            | 0.148(0.020)   | 0.036(0.009) | 0.021(0.007) | 0.297(0.031) | 0.282(0.034) | 0.156(0.020) |
| Exon1         | 0.021(0.020)   | 0.042(0.028) | 0.170(0.050) | 0.031(0.017) | 0.476(0.103) | 0.481(0.102) |
| Exon2         | 0.149(0.037)   | 0.030(0.013) | 0.018(0.014) | 0.179(0.036) | 0.117(0.035) | 0.154(0.033) |
| Exon3         | 0.121(0.025)   | 0.032(0.014) | 0.024(0.011) | 0.148(0.027) | 0.063(0.022) | 0.145(0.028) |
| Exon4         | 0.198(0.039)   | 0.063(0.020) | 0.037(0.017) | 0.272(0.048) | 0.242(0.053) | 0.203(0.035) |
| Exon5         | 0.099(0.030)   | 0.018(0.012) | 0.026(0.014) | 0.316(0.057) | 0.335(0.061) | 0.117(0.030) |
| Exon6         | 0.131(0.031)   | 0.021(0.012) | 0.000(N/5a)  | 0.309(0.050) | 0.283(0.051) | 0.135(0.031) |
| Exon7         | 0.032(0.012)   | 0.025(0.011) | 0.010(0.007) | 0.263(0.036) | 0.253(0.036) | 0.022(0.008) |

**Dn**

|               | Within a locus |              |              | Between loci |              |              |
|---------------|----------------|--------------|--------------|--------------|--------------|--------------|
|               | <b>5a</b>      | <b>2b</b>    | <b>5b</b>    | <b>5a-2b</b> | <b>2b-5b</b> | <b>5b-5a</b> |
| Entire region | 0.123(0.013)   | 0.033(0.006) | 0.027(0.005) | 0.271(0.023) | 0.248(0.024) | 0.157(0.015) |
| V1            | 0.145(0.025)   | 0.032(0.010) | 0.022(0.009) | 0.181(0.028) | 0.090(0.022) | 0.166(0.027) |
| V2            | 0.167(0.028)   | 0.037(0.010) | 0.022(0.007) | 0.379(0.048) | 0.354(0.051) | 0.174(0.025) |
| Exon1         | 0.021(0.021)   | 0.043(0.027) | 0.200(0.069) | 0.032(0.018) | 0.758(0.369) | 0.773(0.373) |
| Exon2         | 0.167(0.046)   | 0.031(0.013) | 0.018(0.013) | 0.205(0.048) | 0.127(0.043) | 0.174(0.043) |
| Exon3         | 0.132(0.030)   | 0.033(0.014) | 0.024(0.011) | 0.165(0.034) | 0.066(0.023) | 0.161(0.034) |
| Exon4         | 0.233(0.054)   | 0.066(0.023) | 0.038(0.018) | 0.339(0.078) | 0.293(0.078) | 0.236(0.050) |
| Exon5         | 0.108(0.035)   | 0.019(0.012) | 0.027(0.016) | 0.411(0.094) | 0.443(0.111) | 0.128(0.040) |
| Exon6         | 0.146(0.038)   | 0.021(0.012) | 0.000(N/5a)  | 0.398(0.097) | 0.355(0.092) | 0.151(0.040) |
| Exon7         | 0.033(0.012)   | 0.025(0.011) | 0.010(0.007) | 0.324(0.066) | 0.308(0.064) | 0.022(0.008) |

**Reference**

|           |                                                                    |
|-----------|--------------------------------------------------------------------|
| MSDC2     | Ps 0.078(0.016), Pn 0.011(0.003), Ds 0.083(0.018), Dn 0.011(0.003) |
| Arfaptin2 | Ps 0.116(0.021), Pn 0.000(N/A), Ds 0.126(0.025), Dn 0.000(N/A)     |

Abbreviations: Arfaptin2, ADP-ribosylation factor interacting protein 2b ; MSDC2, male sterility domain containing-2 (Rossmann-fold NAD(P)(+)-binding proteins). Data compares reference BACs and PACs.

**Supplement table 2a.** Nucleotide substitution; genetic regions unlinked to VCBP2/5 cluster.

| <b>Genes</b> | <b>#alleles</b> | <b>Ps</b>    | <b>Pn</b>    | <b>Ds</b>    | <b>Dn</b>    |
|--------------|-----------------|--------------|--------------|--------------|--------------|
| VCBP3        | 7               | 0.193(0.015) | 0.008(0.002) | 0.224(0.021) | 0.008(0.002) |
|              | V1              | 0.219(0.025) | 0.008(0.004) | 0.261(0.038) | 0.008(0.004) |
|              | V2              | 0.162(0.024) | 0.010(0.004) | 0.185(0.033) | 0.010(0.004) |
| Big Dfsn     | 8               | 0.082(0.021) | 0.011(0.004) | 0.088(0.024) | 0.011(0.005) |
| GAPDH        | 6               | 0.061(0.018) | 0.004(0.003) | 0.064(0.019) | 0.004(0.003) |

**Supplement table 2b.** Additional alleles compared; estimates of average codon-based evolutionary divergence between sequences.

| <b>Genes</b> | <b># alleles</b> | <b>Domain</b> | <b>Ps</b> | <b>s.e.</b> | <b>Pn</b> | <b>s.e.</b> |
|--------------|------------------|---------------|-----------|-------------|-----------|-------------|
| 5a   VCBP5   | 4                | V1            | 0.22      | 0.03        | 0.11      | 0.02        |
|              |                  | V2            | 0.18      | 0.03        | 0.14      | 0.02        |
| 2b   VCBP2   | 8                | V1            | 0.15      | 0.02        | 0.07      | 0.01        |
|              |                  | V2            | 0.14      | 0.02        | 0.08      | 0.01        |
| 5b   VCBP5   | 6                | V1            | 0.13      | 0.02        | 0.02      | 0.01        |
|              |                  | V2            | 0.11      | 0.02        | 0.03      | 0.01        |

**Supplement table 1 and 2**

The proportion of synonymous (Ps) and non-synonymous substitutions (Pn) and the number of synonymous (Ds) and nonsynonymous (Dn) differences per site is shown with standard errors estimated by a bootstrap procedure (100 replicates; as implemented in MEGA4). For each gene, BAC/PAC reference alleles were included. Abbreviations: GAPDH, glyceraldehyde 3-phosphate dehydrogenase; Big Dfsn, Big Defensin.

**Supplement table 3.** Accession numbers of referenced sequences.

| Gene (locus) | Allele                                        | Genbank accession                                         |
|--------------|-----------------------------------------------|-----------------------------------------------------------|
| VCBP5S1 (5b) | VCBP5S1*01-04                                 | AF532183, BK006758,<br>BK006763, BK006769                 |
|              | VCBP5S1*05-07                                 | HM048952-54                                               |
| VCBP5b       | VCBP5b-01                                     | HM048966                                                  |
| VCBP5        | VCBP5-01-04                                   | HM048967-70                                               |
| VCBP2/5-HV   | VCBP2/5HV-NS04M                               | HM048971                                                  |
| VCBP5S2 (5a) | VCBP5S2*01-03                                 | BK006759, BK006761,<br>BK006755                           |
|              | VCBP5S2*04                                    | HM048946                                                  |
| VCBP5a       | VCBP5a-01-04                                  | HM048962-65                                               |
| VCBP2S1 (2b) | VCBP2S1*01-09                                 | AF520473, BK006760,<br>BK006762, BK006768,<br>HM048947-51 |
| VCBP2-like   | VCBP2*01-07                                   | HM048955-61                                               |
| VCBP2b       | VCBP2b-01-05                                  | HM048972-76                                               |
| VCBP3S1      | VCBP3S1*01-08                                 | AF520474, BK006764-66,<br>HM048936-38                     |
| Big Defensin | Bf-BD*01-08                                   | HM048928-35                                               |
| GAPDH        | GAPDH*01-06                                   | HM048940-45                                               |
| Arfaptin2    | JGI-ProteinID<br>Brafl1_96986<br>Brafl1_79183 | derived from EU875589-90                                  |
| MSDC2        | JGI-ProteinID<br>Brafl1_79185<br>Brafl1_96985 |                                                           |

| Reference Haplotype   | Genbank accession |
|-----------------------|-------------------|
| BAC contig 63n5-43b24 | EU875590          |
| BAC 62d19             | EU875589          |
| PAC 37d15             | AC135603.5        |



Supplement figure 1 continued:

B.

```
>z1313_5a-01 DAVSITTVTVPYHNYYVLAADRPWDPTWVNRVEIGCEYTISPA
>z3933_5a-02 DAVSITTVTVPYHNYFVLAADRPWDPTWVNRVEIGCEYSISPA
>z2211_5a-03 DAVSITTVTVPYHNYYVLAADRPWDPTWVNRVEITGCEYSISPA
>z2137_5a-04 DAVSITTVTVPYHNYYVLAADRPWDPTWVNRVEIRCEYTISPA
```

**Supplement figure 2.** Polymorphism of the VCBP2/5 cluster includes haplotype diversity with CNV. Predicted from genomic PCR haplotyping and sequencing performed on additional PAC library animals, as well as various independent animals.

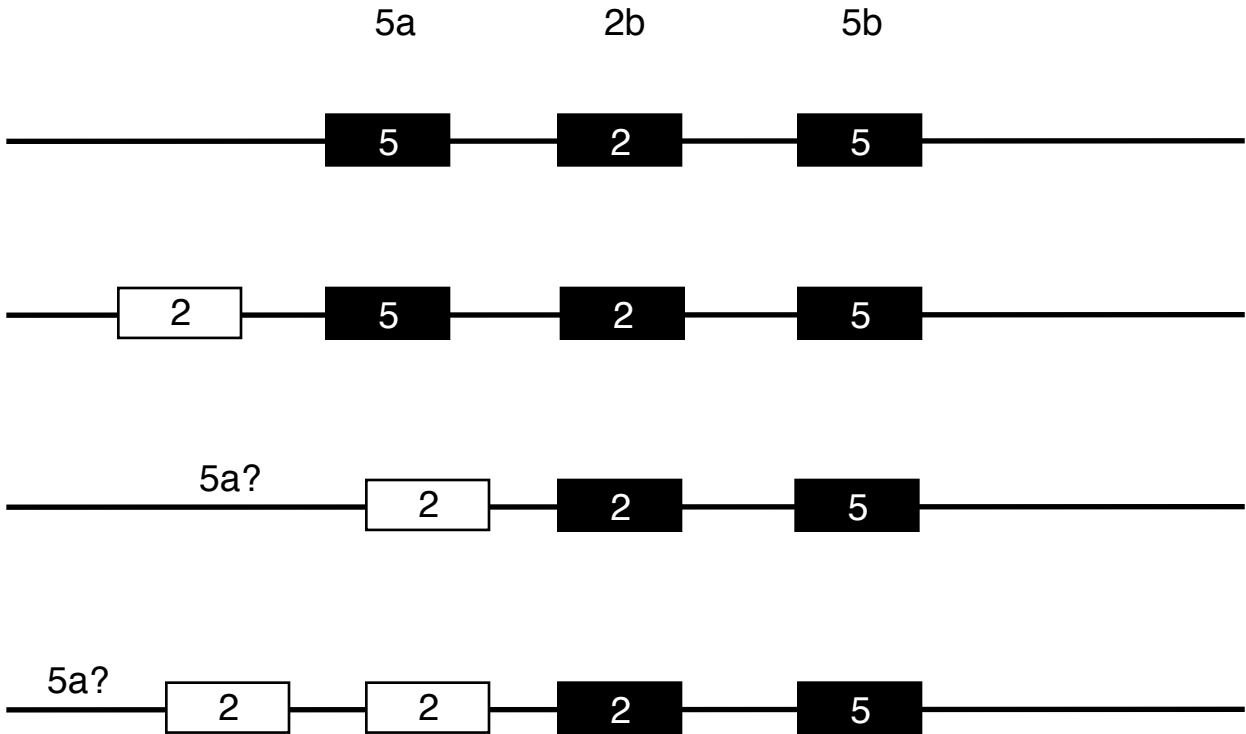

**Supplement figure 3.** Genetic complexity in VCBP 2 genes; alleles or paralogous copies? VCBP2 genes (2b locus and others, i.e., CNVs) form as many as 6 major groups of sequences, each group possessing a specific hotspot type (encoded in EX2) with many subtype variants. Determining their relationships can be difficult due to varying degrees of polymorphism. VCBP2 alleles can be 99% identical to as low as 70%, which in some cases have been confirmed as paralogous genes. The presence of CNVs preclude the assignment of all 2-type alleles as 2b-type genes. Genomic comparison of introns and intergenic DNA is further required. **A.** Minimum evolution analysis of translated VCBP2 cDNA sequences form five major groups (clades) sharing specific, previously characterized, hotspot types. EX2 motifs are shown, as recognized between the first two proline residues. Genomic haplotyping further confirms that some of the clades represent CNV genes (i.e., paralogs); asterisks. Poisson corrected distances were implemented; gaps were eliminated via complete deletion; branching support was estimated with 1000 bootstrap repetitions in Mega 4. **B.** Full length sequence alignment of the cDNA alleles from A.

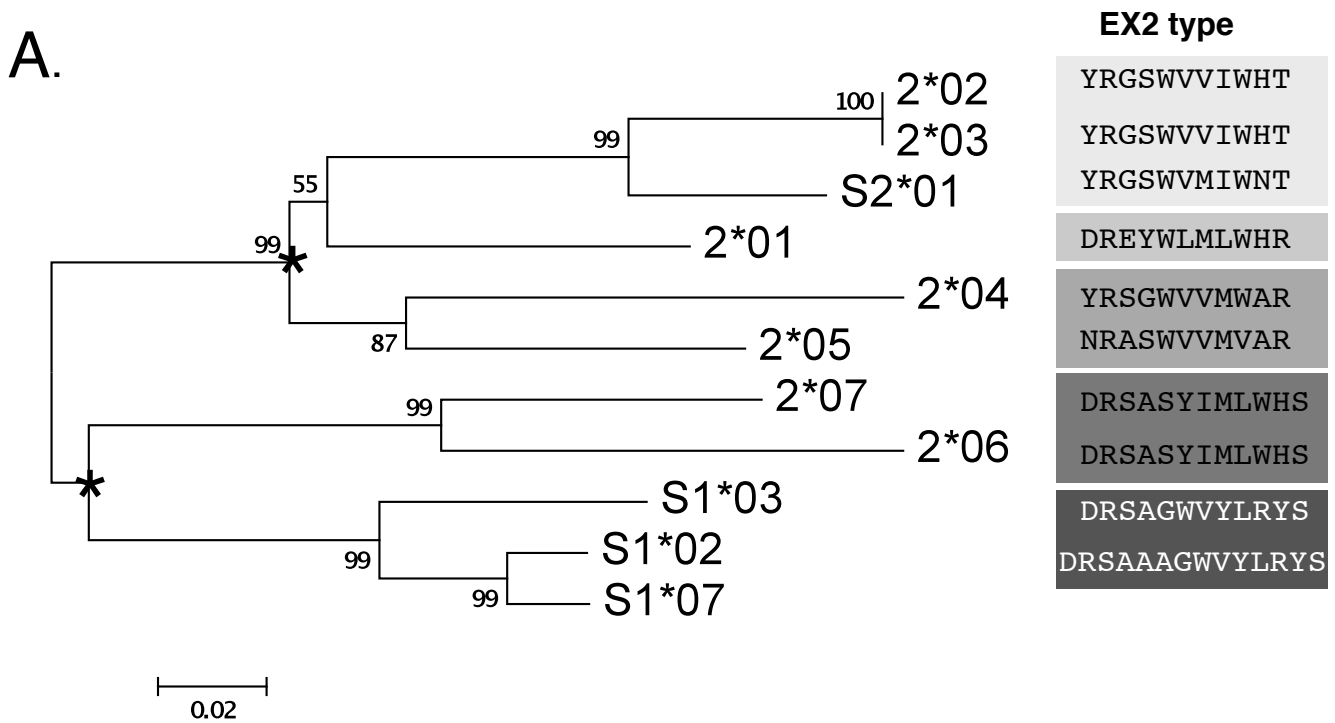



Supplement figure 3 continued

B.

```

*           20           *           40           *           60           *           80
2*04 : DAVSITNVTVPYRS---GWVVMWARP GDPTWVNRVIEFRCEYTI SPASATPPTITWLRGSFADEDRQVVYKWSSSGEVYVH : 77
2*05 : DAVSITNVTVPNRA---SWVVMVARPDDPTWVNRVIEFRCEYSI SPASATPPTVTWLKGSFGHADRQVIYKWSSSGEVYVH : 77
2*02 : DAVAITNVTAPYRG---SWVVIWHTWGDPTFVNRVEIGCEYSI SSAPATPPTITWLKGSFT--DRQVIYKLSSSGEVYVH : 75
2*03 : DAVAITNVTAPYRG---SWVVIWHTWGDPTFVNRVEIGCEYSI SSAPATPPTITWLKGSFT--DRQVIYKLSSSGEVYVH : 75
S2*01 : DAVSITNVTAPYRG---SWVVIWNTWWDPTWVNRVIEFRCEYTI SPAPATPPTITWLKGSFT--DRQVIYKLSSSGEVYVH : 75
2*01 : DAVSITNVTVPDRE---YWLMLWHRPDDPTWVNRVEIFGCEYSI SPAPATPPTITWLKGSFT--DRQVIYKWSSSGEYVH : 75
S1*02 : GAVSITNVTVPDRSAAAGWVYLYRSPD-PTWVNRVIEFRCEYTI SPASANPPTITWLKGFPT--DRQVIYKWSSSGEVYVH : 77
S1*07 : -----AGWVYLYRSPD-PTWVNRVIEFRCEYTI SPASANPPTITWLKGFPT--DRQVIYKWSSSGEVNVH : 61
S1*03 : GALSITNVTLPDRS--AGWVYLYRSPD-PTWVNRVIEFRCEYSI SPAPATPPTITWLKGFPTDADRLVVYKWSSSGEVYVH : 77
2*07 : DAVSITNVTVPDRS--ASYIMLWHRPDDPTWENRVEFRCEYNI SPAPATPPTITWLMGSFTNAARHVYIKWSSSGEVYVH : 78
2*06 : DAVSITNVTVPDRS--ASYIMLWHRPEGPTWQNRVEFRCEYDI SPAPATPPTITWLMGSFTNAARQVIYKWSSSGEVYVH : 78

```

```

*           100          *           120          *           140          *           160
2*04 : PEFAGRVSVESRTRPTLVLTDAKFDWGRYFCRITNENQSDDFGTDEESVLFWYKY-GYD---PPRGSQFITSVEVDKTPV : 153
2*05 : PEYAGRVSVESRTRPTLVLTDAKLDDWGRYWCRTVNEEQSDDFGTDEESLFLWYQW-GYS---PARGSHYTFVEVGTKPV : 153
2*02 : PEYAGRVSVPSTRPTLVLTDAKFDWGRYWCRTVNEEQSDFGTDEESRLEWFRS-SYD---PARGDYSFVKVDKTPV : 151
2*03 : PEYAGRVSVPSTRPTLVLTDAKFDWGRYWCRTVNEEQSDFGTDEESRLEWFRS-SYD---PARGDYSFVKVDKTPV : 151
S2*01 : PEYAGRVSVPSTRPTLVLTDAKFDWGRYWCRTVNEEQSDDFGTDEESRLEWFRS-SYD---PARGSHYSFVQVDKTPV : 151
2*01 : SEFAGRVSVPSRTHPTLVLTDAKFDDWGRYWCRTVNEEQSDDFGTDEESRLEWYRY-GYD---PARGSHYSFVEVDKTPV : 151
S1*02 : PEFAGRVSVESRTRPTLVLTDAKYDDWGRYWCRTVNEEQSDFGTDEESLFLFYKSTVYDYDVPARGGQYSFVEVDKTPV : 157
S1*07 : PEFAGRVSVESRTRPTLVLTDAKFDDWGRYWCRTVNEEQSDFGTDEESLFLFYKSTVYDYDVPARGGQYSFVEVDKTPV : 141
S1*03 : PEFAGRVSVPSRTRPTLVLTDAKFDDWGRYWCRTVNEEQSDFGTDEESLFLFYKSTVYDYDAPPARGGYSFVEVDKTPV : 157
2*07 : PDYTRVSVESRTHPTLILVNQ--GGWGRYWCRTVNEEQSDFGTDEESLFLFYNTGAYN---PPRGSQYSFVEVDKTPV : 153
2*06 : PDEFAGRVSVESRTHPTLILVNQ--GGWGRYWCRTVNEEQSDFGTDEESLFLFYTTGAYN---PPRGSQYSFVEVDKTPV : 153

```

```

*           180          *           200          *           220          *           240
2*04 : RVETGGAARLNCDEGLGGKEASIVWFKGPNCTQDGN CNVYEMVINKTAVEHFSP--DPGT VNVSPKYAGRASLGANNMGDT : 231
2*05 : RVKTTGGTARLRCEGLGGKEASIVWFKGPNCTQDGN CNVYEMVINKTAVGHWSF--DPGT VNVSPKYAGRASLGANNMGDT : 231
2*02 : RVKTTGGTAKLLCEGWWGGKEASIVWFKGPNCTQDGN CNVYEMVINKTAVEHFSP--DPGT VNVSPKYAGRASLGANNMGYT : 229
2*03 : RVKTTGGTAKLLCEGWWGGKEASIVWFKGPNCTQDGN CNVYEMVINKTAVEHFSP--DPGT VNVSPKYAGRASLGANNMGYT : 229
S2*01 : RVKTTGGTAKLHCEGWWGGKASIVWFKGPNCTQDGN CNVYEMVINKTAVEHFSP--DPGT VNVSPNYAGRASLGANNMGYT : 229
2*01 : RVKTTGATARLHCEGLGGKEASIAWFKGPNCTQDGN CNVYEMVINKTAVGHRSP--DPGT VNVSPKYAGRASLGANNMGDT : 229
S1*02 : RVKAGGTARLNCESGGPLASIVWFKGPNCTQDGN CNVYEMVINKTAVPQPHILGPGT VNVSPKYAGRASLDFNDGGYY : 237
S1*07 : RVETGGTARLHCEGWWGGPLASIVWFKGPNCTQDGN CNVYEMVINKTAVPQPHILGPGT VNVSPKYAGRASLDFNDGGYY : 221
S1*03 : RVKTTGGTARLNCQAGGPLASIVWFKGPNCSQDGN CNVYEVINKTAVPQPHAILGPGT VNVSPKYAGRASLDFNDGPYY : 237
2*07 : RVKAGGTARLNCESGGPLASIVWFKGPNCTQDGN CNVYEMVINKTAVPQPHILGPGT VNVSPKYAGRASLDFNDGGYY : 233
2*06 : HVKAGGTARLHCEGWWGGKEASIAWFKGPNCTQDGN CNVYEMVINKTAVGHSSPDPGTAAVNVSPKYAGRASLGKLDYS-YM : 232

```

```

*           260          *           280          *           300          *           320
2*04 : -----L DLTITDIRPTDVGRYWCTNDWPLWF-MNEIHSRDSRSVVVLLDDEAP--SCDGKPDGMYQDPGDCSRYYT : 299
2*05 : -----L DLTITDIRPADVGRYWCTNDWPFMS-WNE----- : 260
2*02 : -----L DLTITDIRPADVGRYWCTNDWPLYF-RNEVQSRDSQSVVVLLDDEAP--SCDGKADGMYQDPGDCSRYYT : 297
2*03 : -----L DLTITDIRPADVGRYWCTNDWPLYF-RNEVQSRDSQSVVVLLDDEAP--SCDGKADGMYQDPGDCSRYYT : 297
S2*01 : -----L DLTITDIRPADVGRYWCTNDWPLYF-RNEVQSRDSQSVVVLLDDEAP--SCDGKADGMYQDPGDCSRYYT : 297
2*01 : -----L DLTITDIRPTDVGRYWCTNDWPLAMPWNEELRSRNASQSVVVLLDDEAP--SCDGKADGMYRDPGDCSRYYT : 298
S1*02 : NYYP-----L DLTITDIRPTDVGRYWCTDDAPLWYQ-NDLRSRDSQSVVVLLDDEAPTPSCDGKADGMYQDPGDCSRYS : 311
S1*07 : NYYP-----L DLTITDIRPTDVGRYWCTDDAPLWYQ-NDLASRDSQSVVVLLDDEAPTPSCDGKADGMYQDPGDCSRYYT : 295
S1*03 : NYYP-----L DLTITDIRPSDVGRYWCTNDAPLWYQ-NDLRSRDSQSVVVLLDDEAPTPSCDGKADGMYQDPGDCSRYYT : 311
2*07 : NYYP-----L DLTITDIRPTDVGRYWCTDDAPLWYQ-NDLRSRDSQSVVVLLDDEAPTPSCDGKADGMYQDPGDCSRYS : 307
2*06 : GLTFPDMRSL DLTITDIRPTDVGRYWCTNDWPLAEQFN-DLHSRDSQSVVVLLDDEAT--SCDGKADGMYQDPGYCSRYYT : 310

```

```

*           340
2*04 : CSGGWLYGPVPCLTGLFFNEAL : 321
2*05 : ----- : -
2*02 : CSGGWLYGPAPCLTGLFFNEAL : 319
2*03 : CSGGWLYGPAPCLTGLFFNEAL : 319
S2*01 : CSGGWLYGPVPCISGLFFNEAL : 319
2*01 : CSGGWLYGPVPCLTGLFFNEAL : 320
S1*02 : CSGGWLYGPAPCLTGLFFNEAL : 333
S1*07 : CSGGWLYGPVSCLTGLFFNEAL : 317
S1*03 : CSGSWLYGPVPCLTGLFFNEAL : 333
2*07 : CSGGWLYGPAPCLTGLFFNEP- : 328
2*06 : CSGGWLYGPQPCLTGLFFNEAL : 332

```

**Supplemental figure 4.** Putative crossover example in an allele from animal SW01 in the intron just upstream to the hotspot exon, EX2. The first 510bp of allele 5a-01 from SW01 shows sequence identity to BAC clone 62d19 and the remainder of the sequence is most similar to BAC contig clone 63n5-43b24. Potential crossover region is boxed; small indel noted (arrow). Bold dashed lines in BAC alleles represent sequence removed for illustration purposes.

```

220           230           240           250           260           270           280
62d19-Ge... TGAACAGATTA TCCCGAAGACG TTCACGTGTATGAGGGCTTATATG TCCAAGAAAA TAACTAGTGCGAAGC
3927-392... TGAACAGATTA TCCCGAAGACG TTCACGTGTATGAGGGCTTATATG TCCAAGAAAA TAACTAGTGCGAAGC
63n5-43b... -----
290           300           310           320           330           340           350
62d19-Ge... AGTGGAGAGCTGATACAAGTCTTTTTTACTAGCCTCTGCTGCAGTCTTCGAACGGGCGATTTTGAGACGAGG
3927-392... AGTGGAGAGCTGATACAAGTCTTTTTTACTAGCCTCTGCTGCAGTCTTCGAACGGGCGATTTTGAGACGAGG
63n5-43b... -----
360           370           380           390           400           410           420
62d19-Ge... CGAAACTCCCTGCGACGGCAAAC TCCCCTCCACAGCAAAC TCTCTTCC TCGGCAAAC TCCCTTTACATCA
3927-392... CGAAACTCCCTGCGACGGCAAAC TCCCCTCCACAGCAAAC TCTCTTCC TCGGCAAAC TCCCTTTACATCA
63n5-43b... -----
430           440           450           460           470           480           490
62d19-Ge... CAAGAGAA CATAGC CAA CGTTGAAATCGCGTTTTGAAAAAAGAGAA TGTTTTCCA CTACAGATATGGTATG
3927-392... CAAGAGAA CATAGC CAA CGTTGAAATCGCGTTTTGAAAAAAGAGAA TGTTTTCCA CTACAGAGATGGCATG
63n5-43b... -----
500           510           520           530           540           550           560
62d19-Ge... TCAGAA CATAACGAGAAAGTA CCTGAA TGGGGAAA -----
3927-392... TCAGAA CATGACG ---AGTA CCTGAA TGGGGAAA TA TGTCACAGTGG TCTGCAGACACCA TGATTCACTC
63n5-43b... -----AGTA CCTTAAG TGGGGAAA TA TGTCACAGTGG TCTGCAGACACCA TGATTCACTC
570           580           590           600           610           620           630
62d19-Ge... -----
3927-392... AAATA CAGCCGCGTTCGAAGACTGCAA CGGAGGT TACATTTTTTACA AAGTTTCTA CAGTCAA ACTTAGTCT
63n5-43b... AAATA CAGCCGCGTTCGAAGACTGCAA CGGAGGT TACATTTTTTACA AAGTTTCTA CAGTCAA ACTTAGTCT
640           650           660           670           680           690           700           710
62d19-Ge... -----
3927-392... AAACAGAGG CCGT TACTGTTTCA CACGATCA CGAAGATAGTATCTTAAAACGCCAGTGGACG TTGGACA TT
63n5-43b... AAACAGAGG CCGT TAGTGTTTCA CACGATCA CGAAGATAGTATCTTAAAACGCCAGTGGACG TTGGACA TT
720           730           740           750           760           770           780
62d19-Ge... -----
3927-392... CAATCCTTTG TAGC ---GAAA TTGACCA TTGTTTGGAGTATCGCACATTTACAAGTTTTTCAGGA
63n5-43b... CAATCCTTTG TAATGAAAA TTTGAAA TTGACCA TTGTTTGGAGTATCGCACATTTACAAGTTTTTCAGGA
790           800           810           820           830           840           850
62d19-Ge... -----
3927-392... CAATCAAGTCCAGGATCAGTTCCGGACCTGCATGGACTCTGAACCCGGACGGGACTCTGAACCTGGACCG-
63n5-43b... CAATCAAGTCCAGGATCAGATCCGGACCTGCATGGACTCTGAACCTGGACGGGACTCTGAACCTGGACCGG

```
